# Supplementary material for: Preparation, electrochemical and spectral properties of free-base and manganese N-methyl-pyridylethynyl porphyrins
Source: Royal Society of Chemistry journal article supplement (doi:10.1039/b713455j), 2007-11-29
Supplement: b713455j.pdf [file b713455j.pdf]

Supplementary Information

## Preparation, Electrochemical and Spectral Properties of Free-Base and Manganese *N*-methyl-Pyridylethynyl Porphyrins

Ching-Yao Lin,\* Yen-Chuan Chen, Chi-Wen Yao, Sung-Chou Huang and Yi-Hui Cheng

*Department of Applied Chemistry, National Chi Nan University, 302 University Road, Puli, Nantou Hsien 54561, Taiwan.*

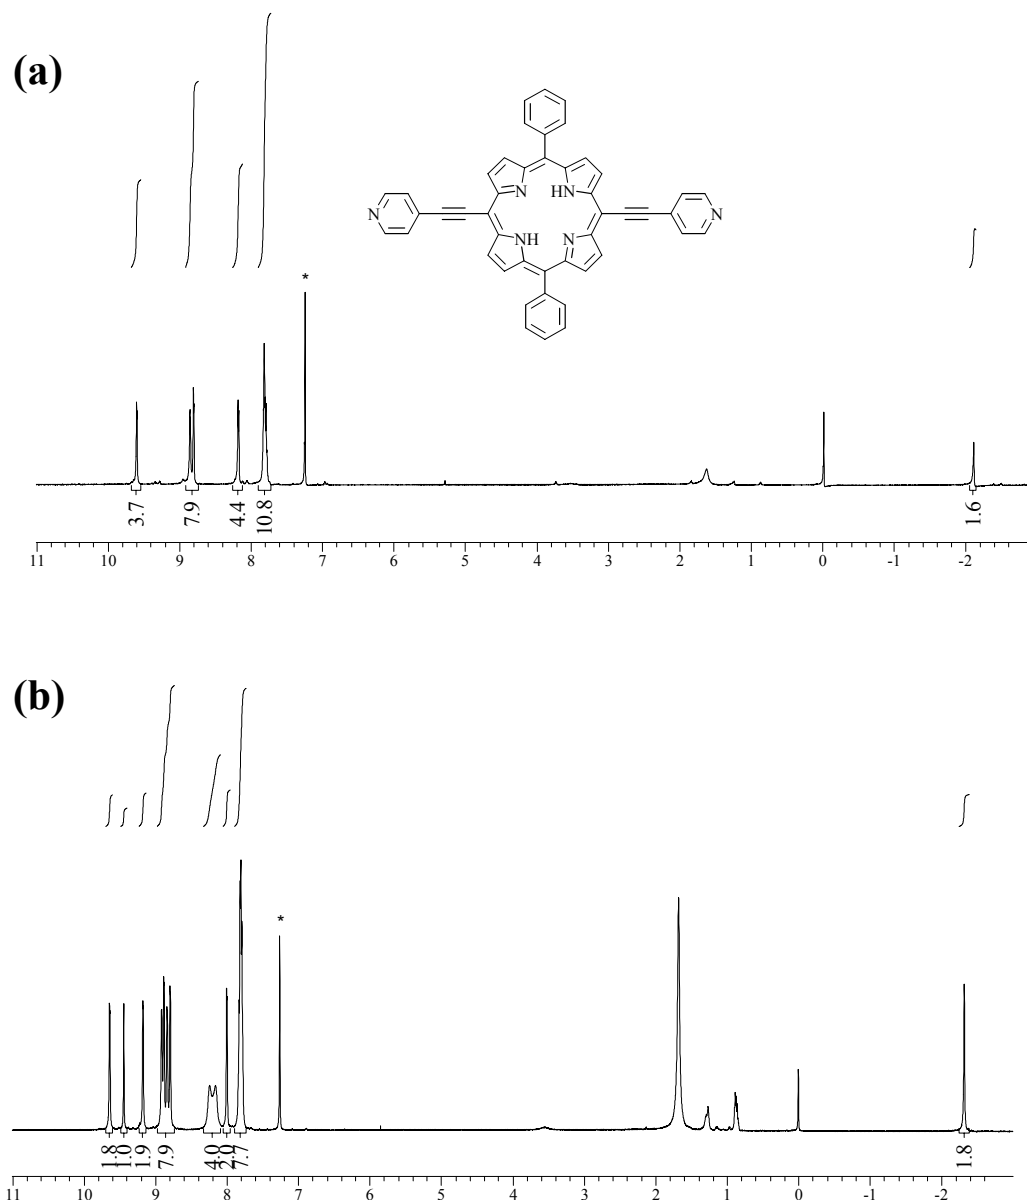

**Figure 1.** <sup>1</sup>H-NMR spectra of (a) un-methylated H<sub>2</sub> 6 precursor from Lindsey's copper-free cross-coupling method and (b) major product from de-metallation of Zn 6 precursor. Comparison of two NMR spectra shows that de-metallation of Zn 6 precursor does not yield H<sub>2</sub> 6 precursor as the major product.

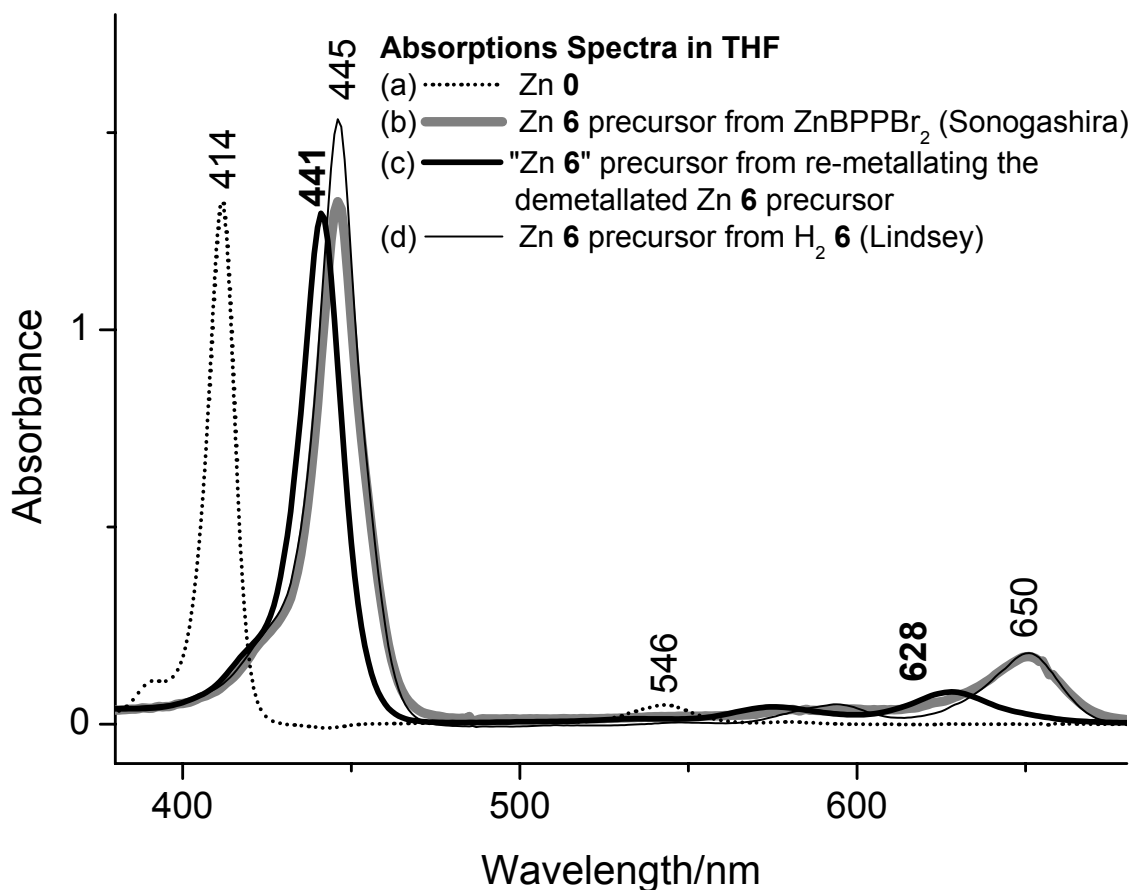

**Figure 2.** UV-Visible spectra of (a) ZnBPP (b) un-methylated Zn 6 precursor from Sonogashira cross-coupling reaction of ZnBPPBr<sub>2</sub> with 4-pyridylethyne (c) "Zn 6" precursor from demetallating Zn 6 then metallating with Zn<sup>2+</sup> (d) Zn 6 precursor from metallating Zn<sup>2+</sup> with H<sub>2</sub> 6 precursor (from Lindsey's copper-free cross-coupling reaction). (c) shows that de-metallation of Zn 6 precursor does not generate H<sub>2</sub> 6 precursor.

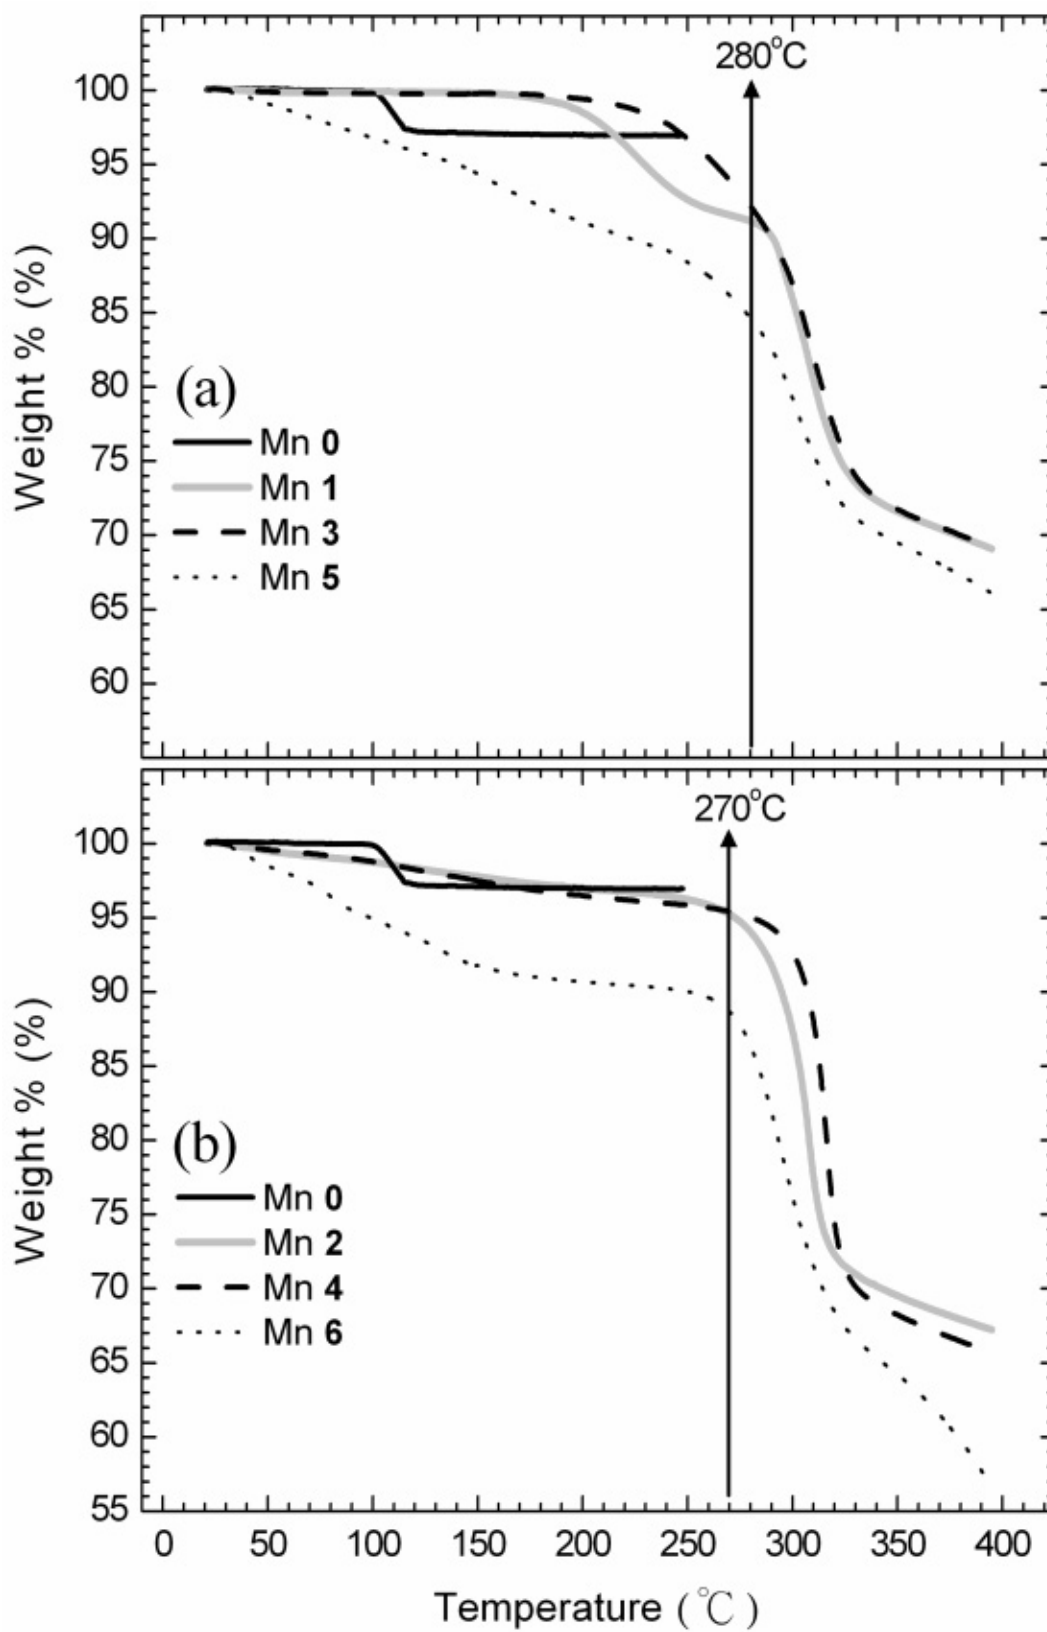

**Figure 3.** TGA (10°C/min) of (a) Mn 0, Mn 1, Mn 3, Mn 5, (b) Mn 0, Mn 2, Mn 4 and Mn 6.

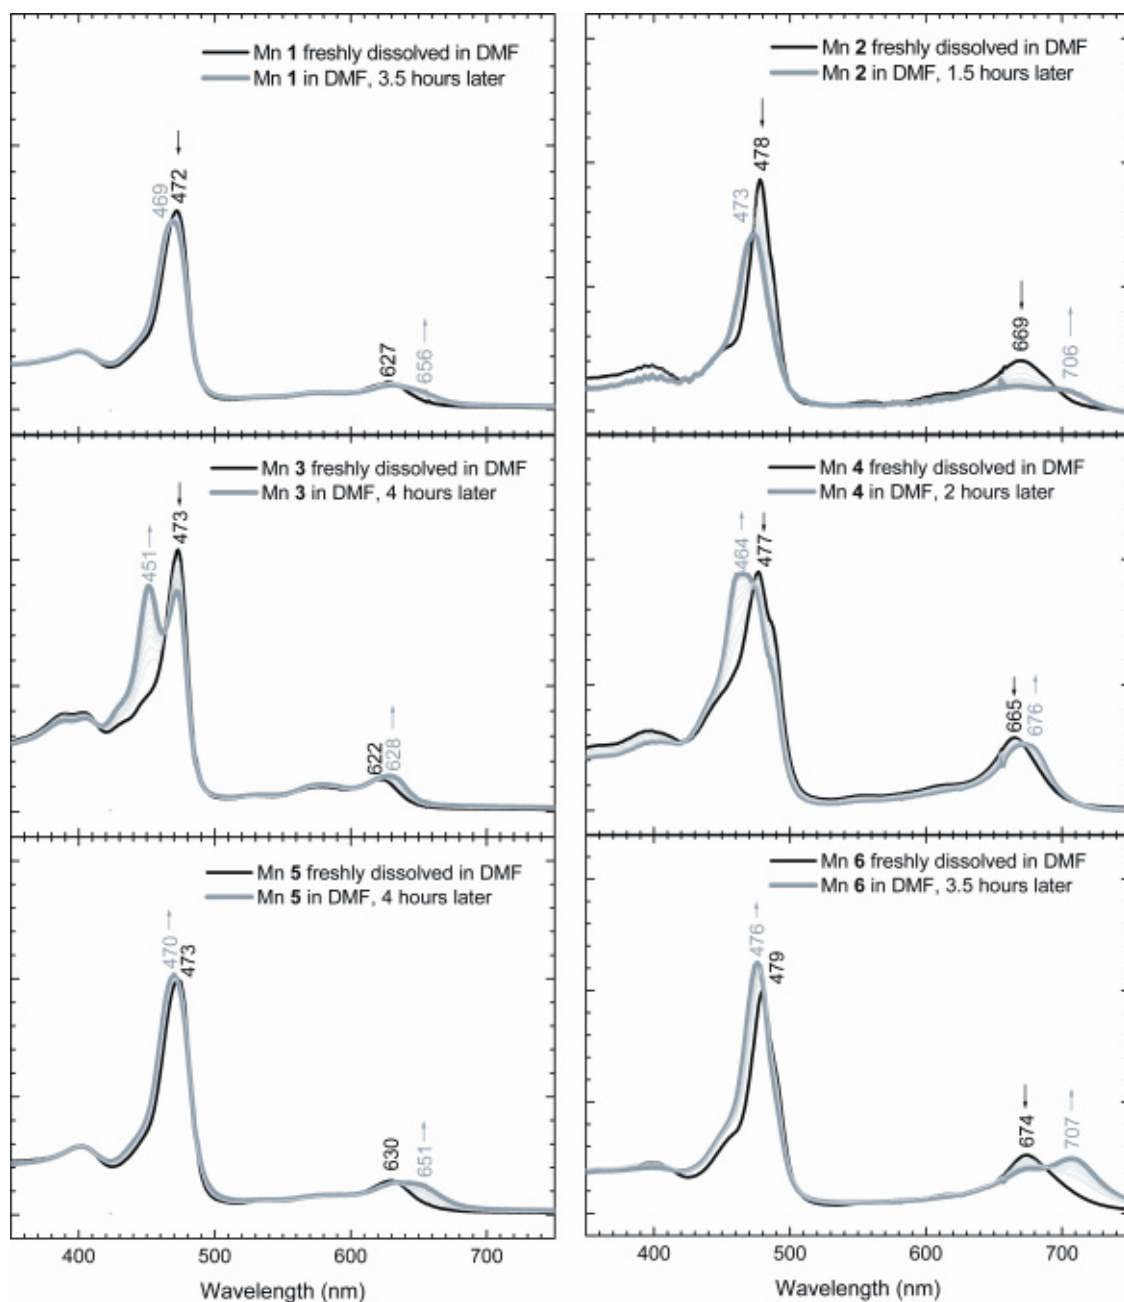

**Figure 4.** UV-Visible spectrum changes of Mn **0** – **6** dissolved in DMF. The spectrum changes are consistent with Mn<sup>III/II</sup> **0** – **6** reductions. The final spectra are mixtures of Mn<sup>III</sup> and Mn<sup>II</sup> **0** – **6** (grey lines).

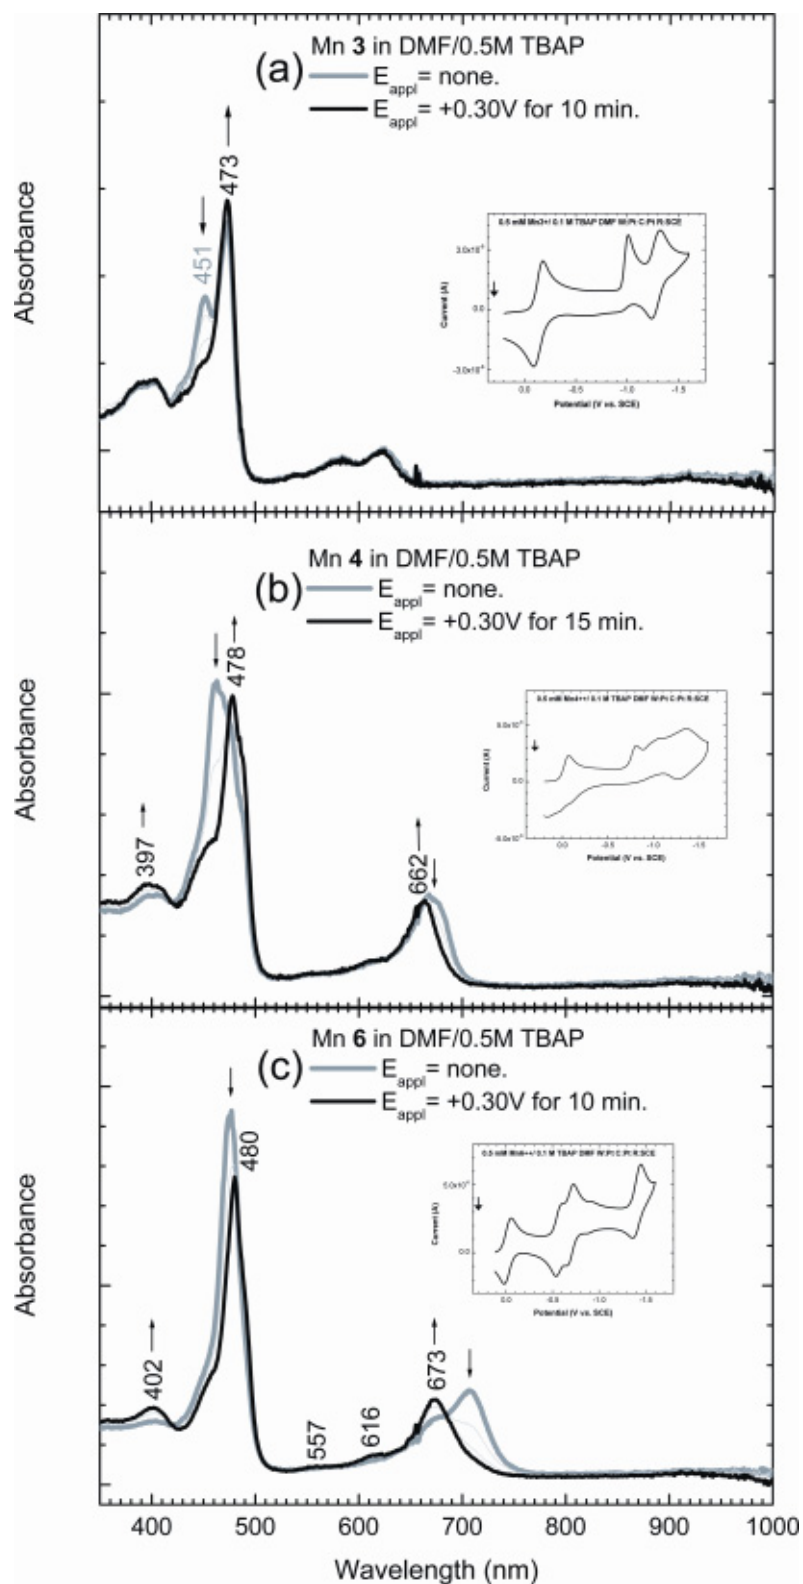

**Figure 5.** UV-Visible spectrum changes of Mn<sup>III/II</sup> **3**, **4**, and **6** mixtures upon applying +0.30 V vs. SCE. These spectro-electrochemical experiments verify our suggestion that Mn<sup>III</sup> **0** – **6** undergo auto-reduction in DMF solutions.

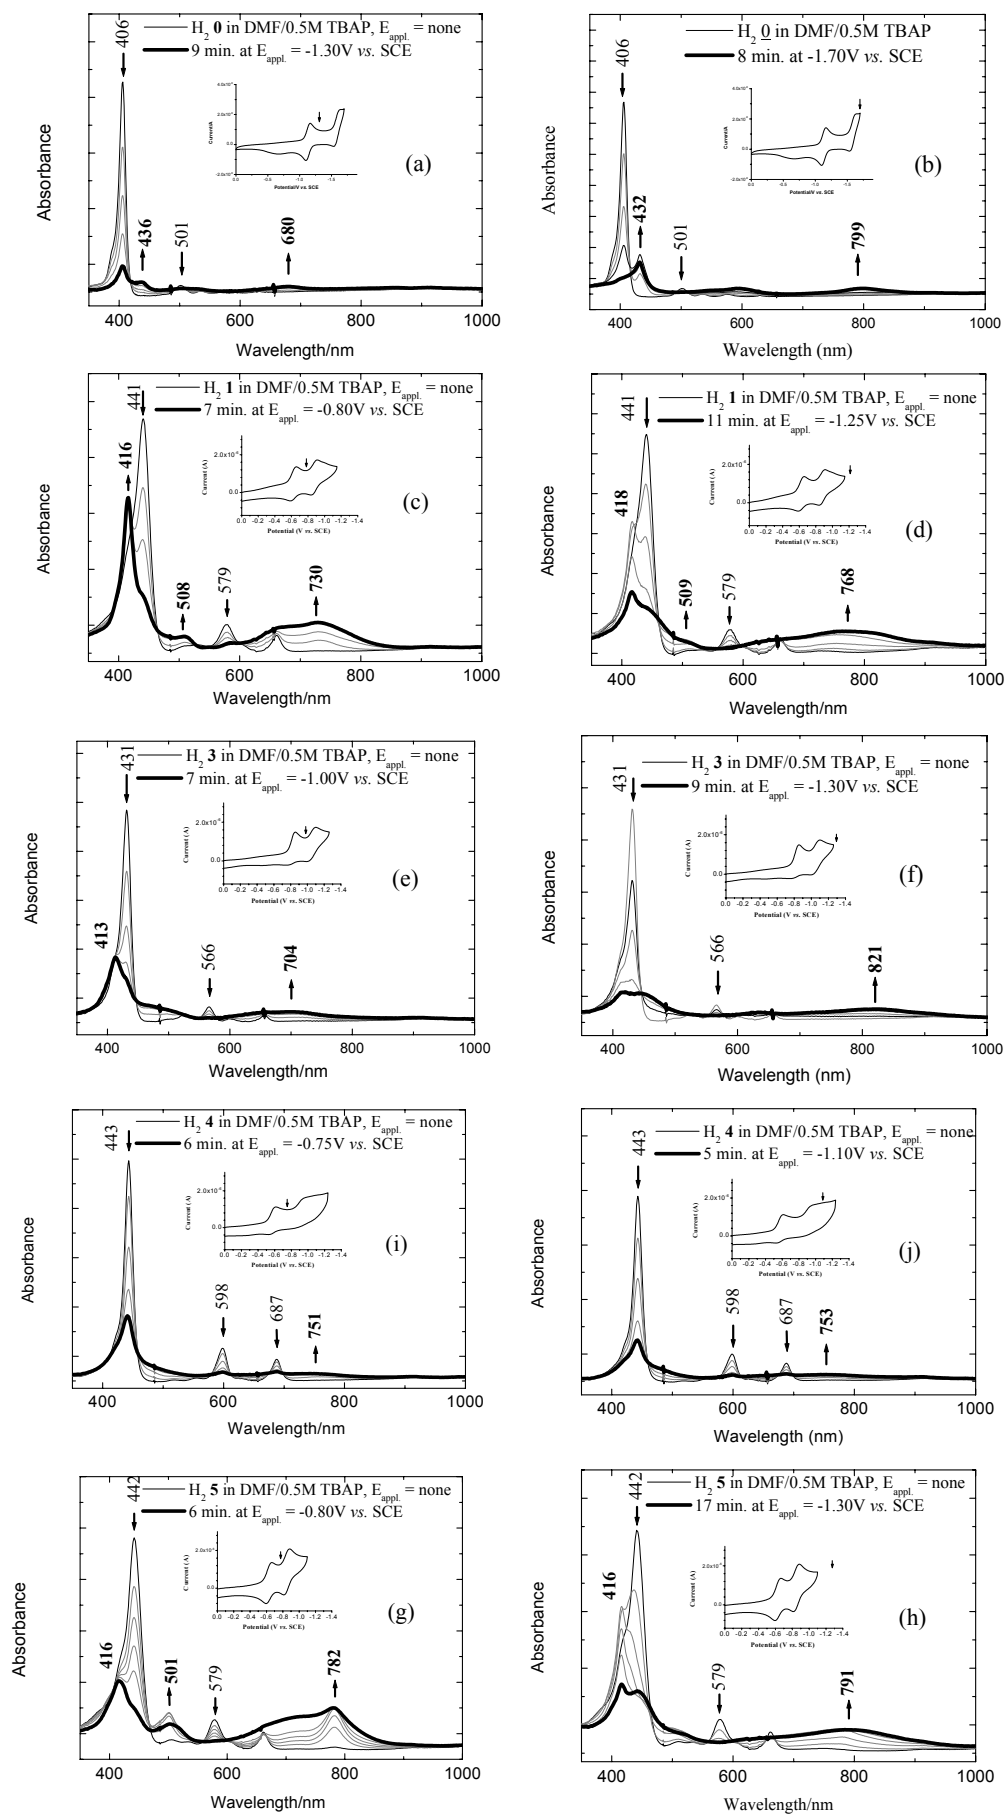

Figure 6. UV-Visible spectrum changes of  $H_2$  0, 1, 3, 5 and 4 upon thin-layer reductions.

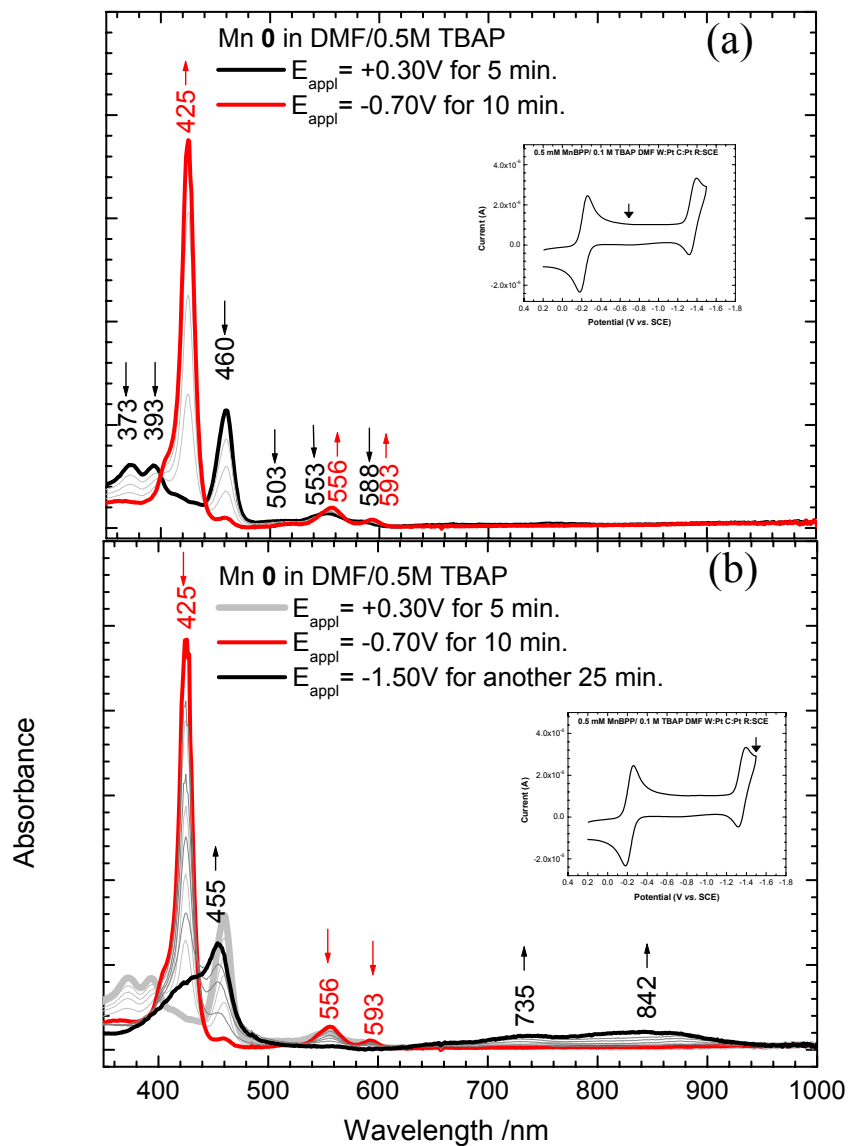

**Figure 7.** UV-Vis visible spectrum changes of Mn 0 upon thin-layer reductions. Recovery rates at +0.30 V vs. SCE (a) 99% (b) 94%.

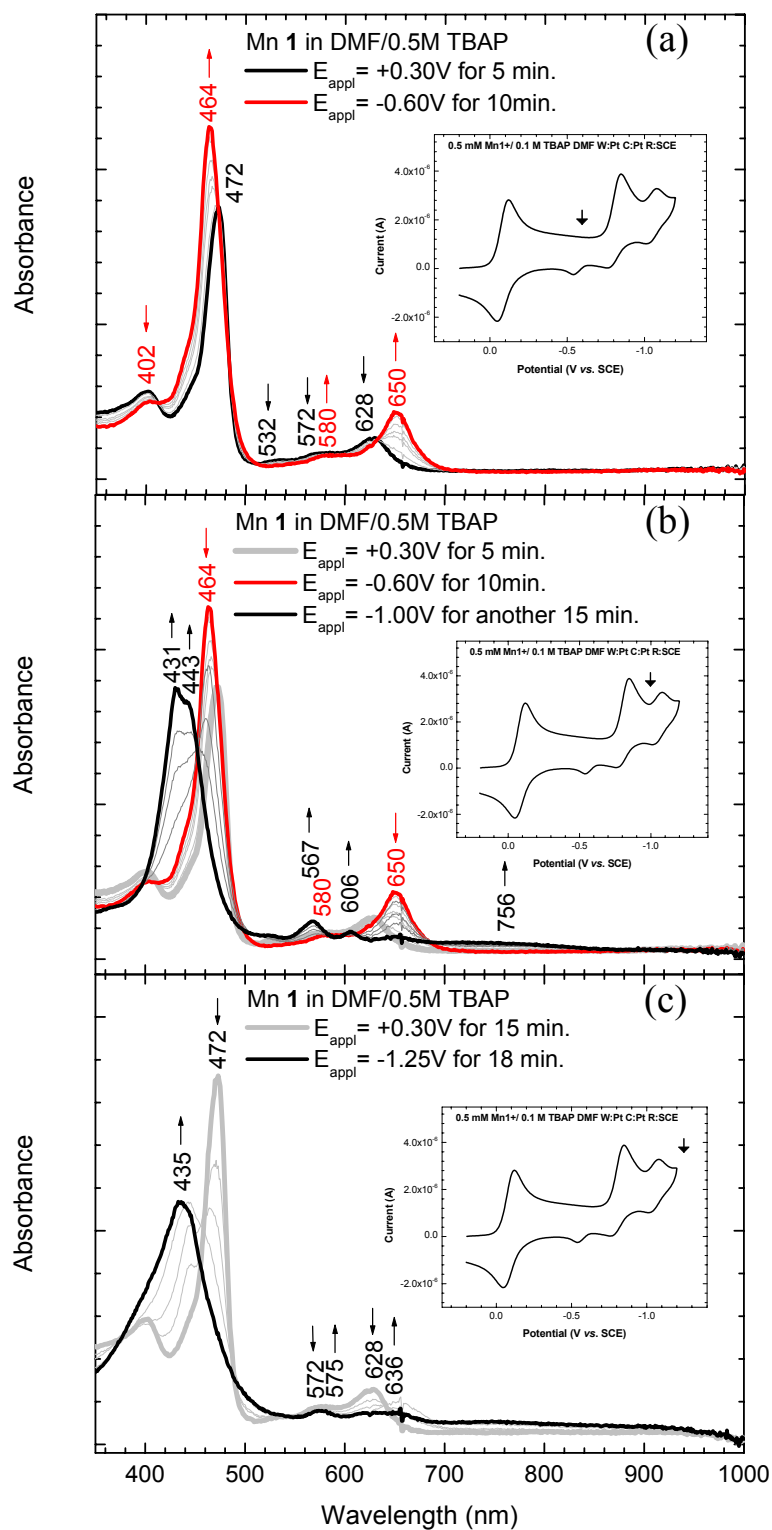

**Figure 8.** UV-Visible spectrum changes of Mn 1 upon thin-layer reductions. Recovery rates at +0.30 V vs. SCE (a) 99% (b) not reversible (c) not reversible.



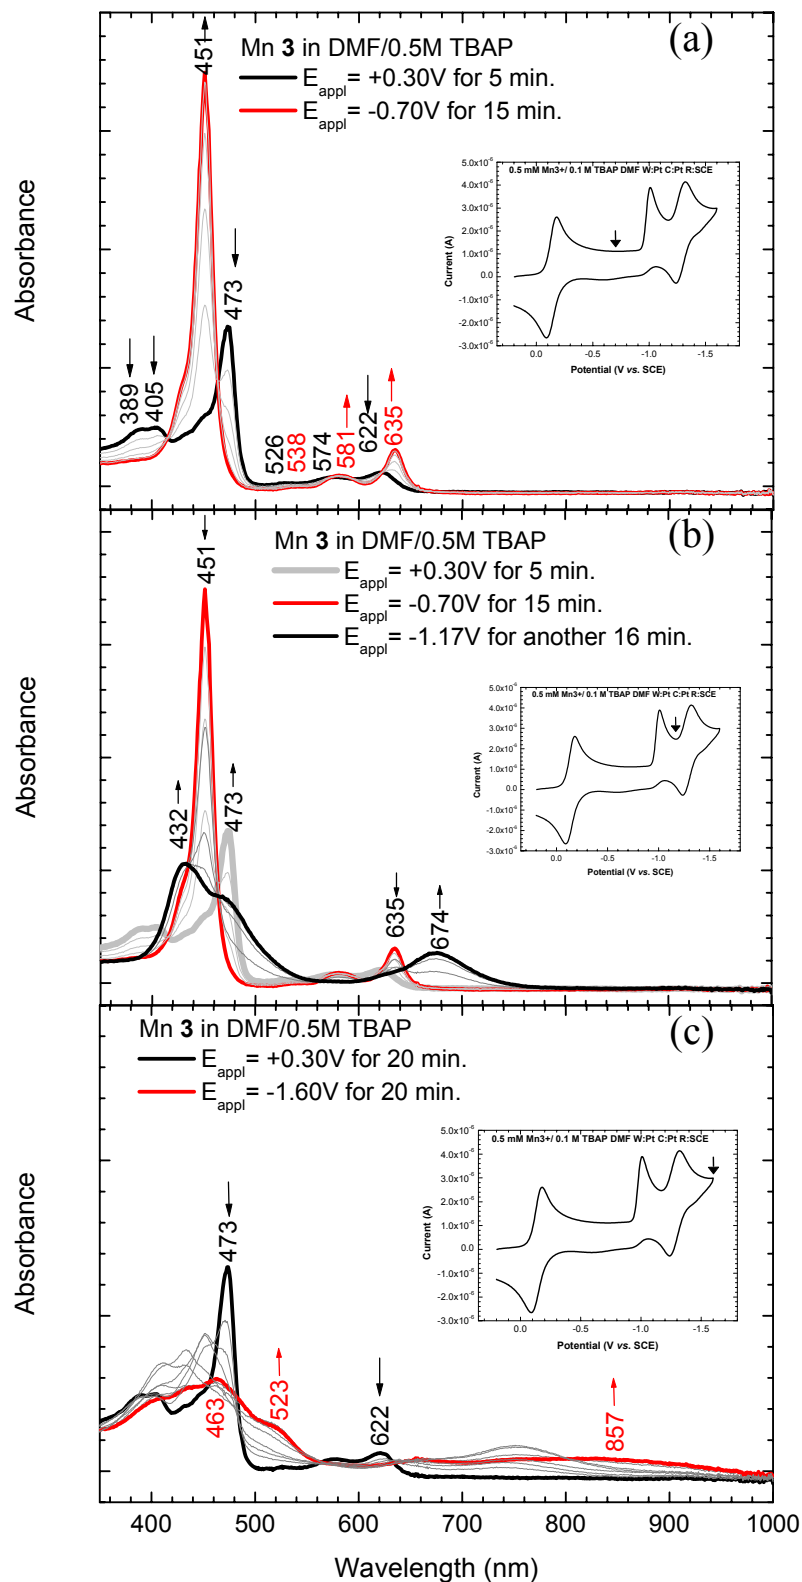

**Figure 9.** UV-Visible spectrum changes of Mn 3 upon thin-layer reductions. Recovery rates at +0.30 V vs. SCE (a) 96% (b) 99% (c) 51%.

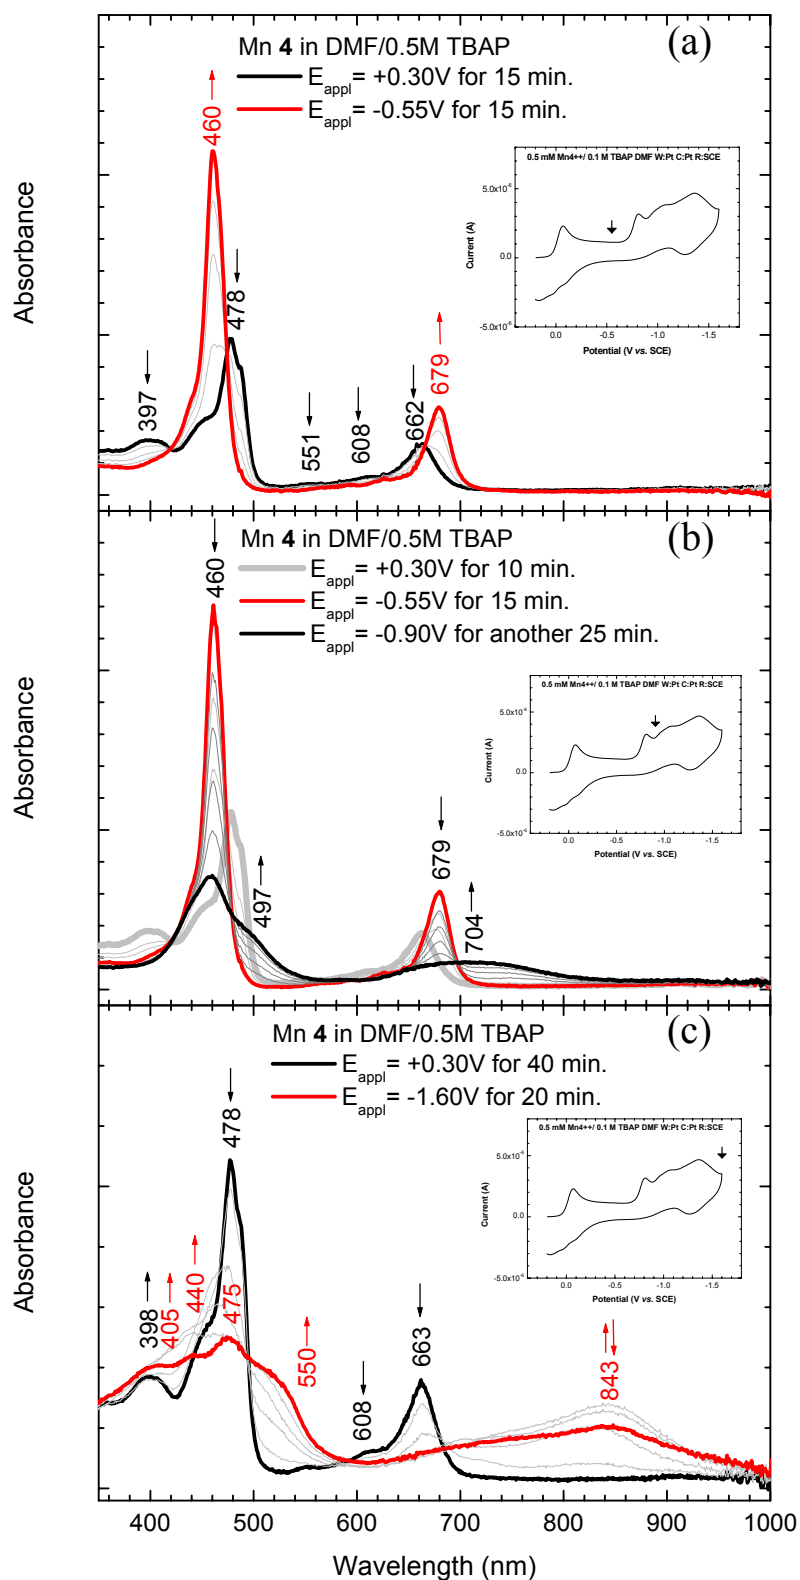

**Figure 10.** UV-Visible spectrum changes of Mn 4 upon thin-layer reductions. Recovery rates at +0.30 V vs. SCE (a) 99% (b) 83% (c) 70%.

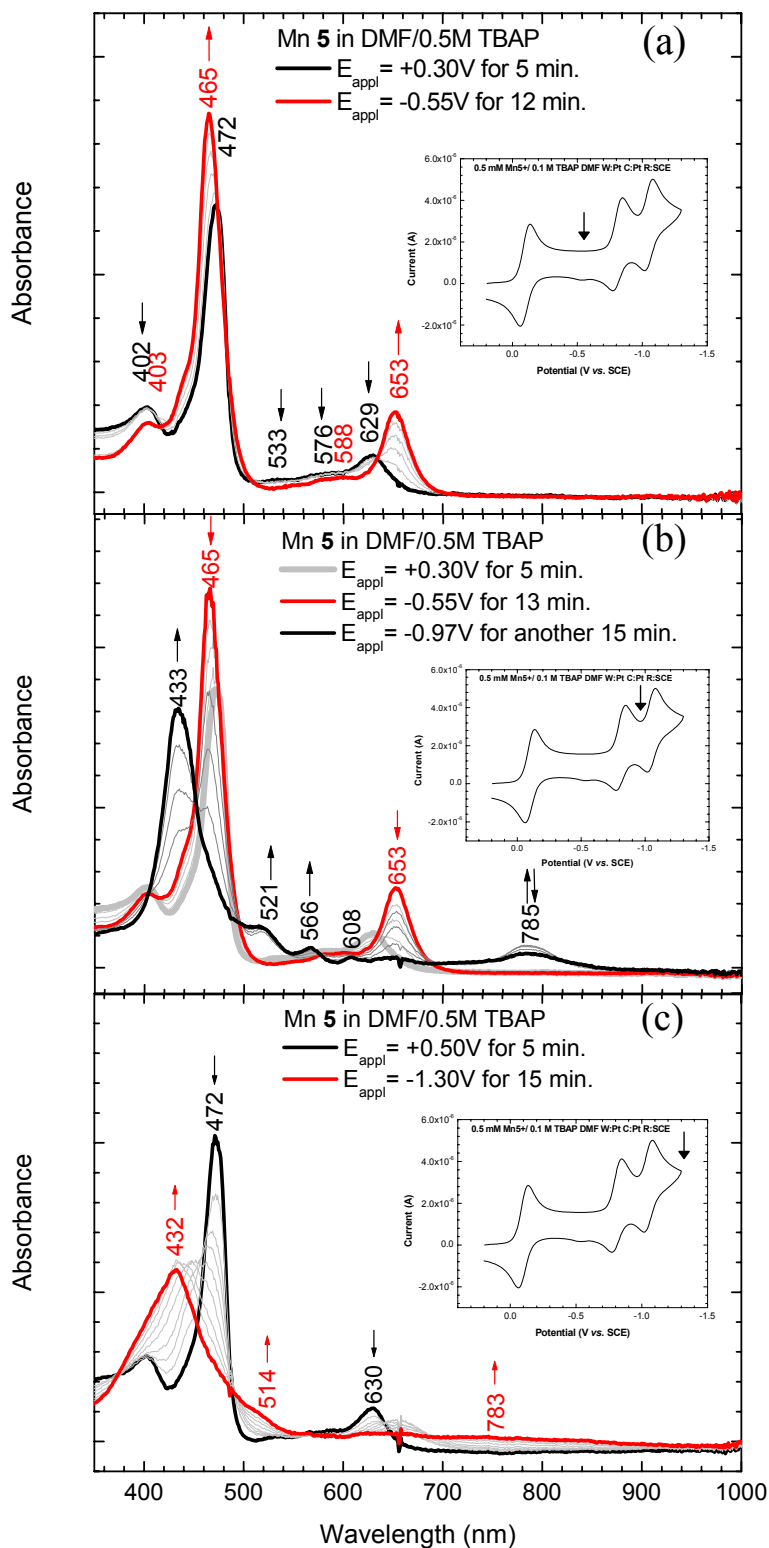

**Figure 11.** UV-Visible spectrum changes of Mn 5 upon thin-layer reductions. Recovery rates at +0.30 V vs. SCE (a) 99% (b) not reversible (c) not reversible.

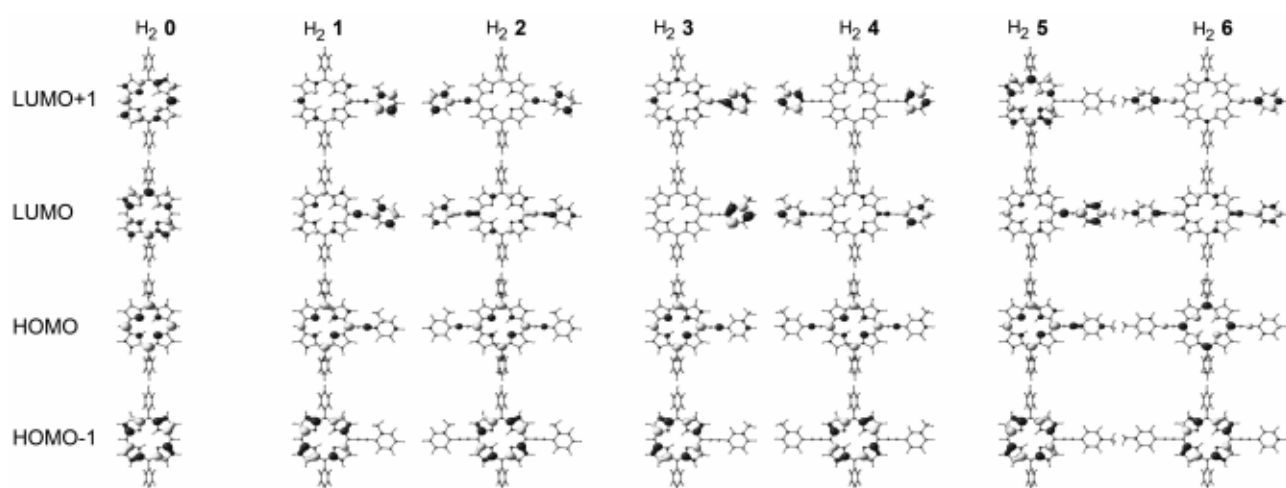

**Figure 12.** Calculated Frontier Molecular Orbitals of H<sub>2</sub> **0** to **6** (B3LYP/LanL2DZ, all IR frequencies of the optimized structures were checked to be positive). Note that these MO patterns are only used to qualitatively compare with the experimentally results.

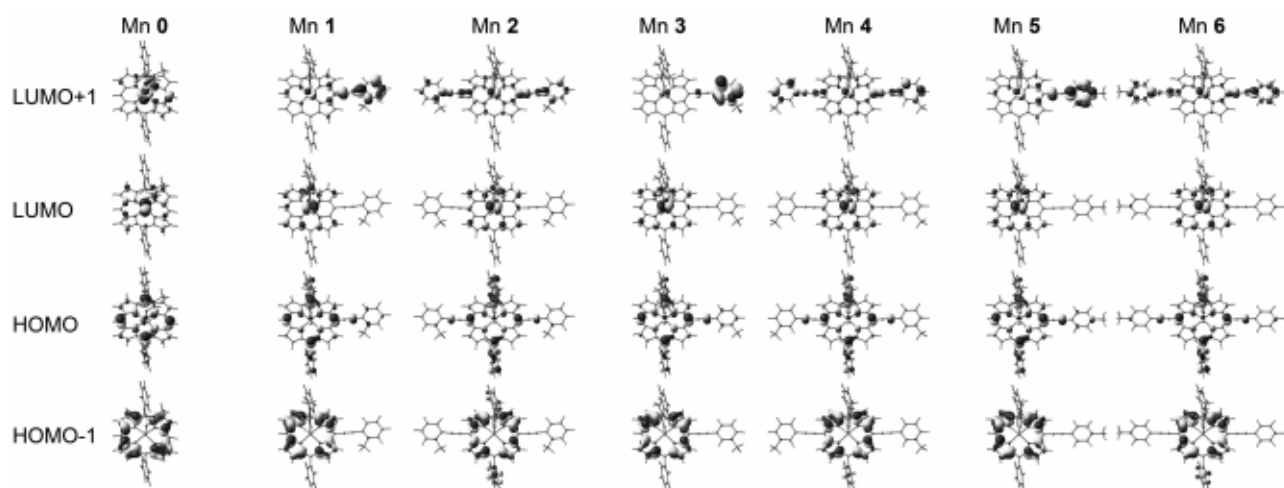

**Figure 13.** Calculated Frontier Molecular Orbitals of Mn **0** to **6** (B3LYP/LanL2DZ, all IR frequencies of the optimized structures were checked to be positive). Note that these MO patterns are only used to qualitatively compare with the experimentally results.
